# Supplementary material for: Combinational physical synthesis methodology and crystal features correlated with oxidizing gas detection ability of one-dimensional ZnO–VOxcrystalline hybrids
Source: Royal Society of Chemistry journal article supplement (doi:10.1039/c5ce01110h), 2015-01-01

### Electronic Supplementary Information

1. Lattice constants and symmetries obtained from the least-square fitting analyses for the thin films grown in Ar and Ar/O<sub>2</sub> mixed ambients are summarized in the table.

| <b>samples</b>    | <b>a (nm)</b> | <b>b (nm)</b> | <b>c (nm)</b> | <b>symmetry</b> | <b>chemical formula</b>       |
|-------------------|---------------|---------------|---------------|-----------------|-------------------------------|
| Ar                | 0.498         | 0.498         | 1.404         | Rhombohedral    | V <sub>2</sub> O <sub>3</sub> |
| Ar/O <sub>2</sub> | 1.152         | 0.357         | 0.437         | Orthorhombic    | V <sub>2</sub> O <sub>5</sub> |

2. (a) AFM image of the  $V_2O_3$  thin film. (b) AFM image of the  $V_2O_5$  film. The root-mean-square (RMS) surface roughness of the  $V_2O_3$  film was approximately 18 nm. RMS surface roughness of the  $V_2O_5$  film was 3.33 nm.

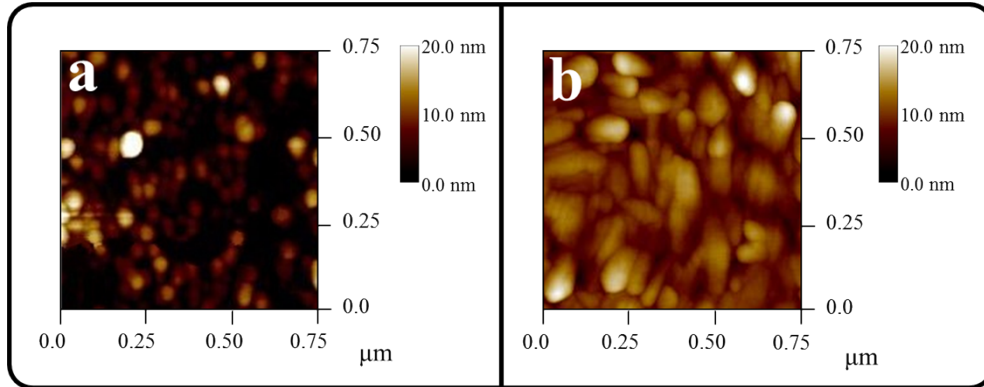

3. XPS analyses of the  $V_2O_3$  and  $V_2O_5$  films: (a)  $V2p_{3/2}$  spectrum of the  $V_2O_3$  film. (b)  $O1s$  spectrum of the  $V_2O_3$  film. (c)  $V2p_{3/2}$  spectrum of the  $V_2O_5$  film. (d)  $O1s$  spectrum of the  $V_2O_5$  film.

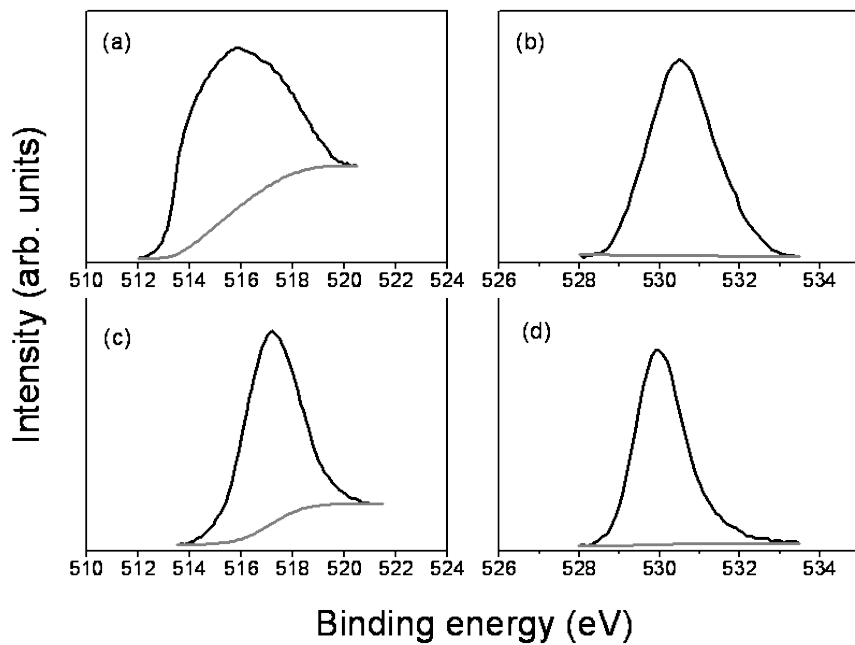

Supplement: c5ce01110h1.pdf [file c5ce01110h1.pdf]
